# Supplementary material for: First Meconium Passage as a Predictor of Early Breastfeeding Success in Term Newborns
Source: Research Square preprint supplement (doi:10.21203/rs.3.rs-7723291/v1), 2025-10-15
Supplement: Supplementary file 1 [file 0b9a8bc89de841e4d7d5f41b.docx]

**Highlights**

- Early meconium passage associated with faster breastfeeding improvement
- Infants passing meconium <7.17 h showed greater early score improvements
- Meconium timing may help identify newborns who need closer breastfeeding support
- Findings support integrating meconium timing into neonatal assessments and discharge planning
- Study provides new evidence linking meconium timing with breastfeeding outcomes
